## **C/EBP $\alpha$ acts as an RNA binding protein essential for its chromatin recruitment and promotes Macrophage differentiation**

5 Yanzhou Zhang<sup>1,3,†</sup>, Mahmoud Bassal<sup>1,2,3,†</sup>, Daniel Friedrich<sup>4,5</sup>, Simone Ummarino<sup>1,3</sup>, Tom Verbiest<sup>1,3</sup>, Junyan Zhang<sup>1,3</sup>, Danielle Tenen<sup>6</sup>, Arthanari Haribabu<sup>4,5</sup>, Daniel G Tenen<sup>1,2,\*</sup>

### **Affiliations:**

<sup>1</sup>Harvard Stem Cell Institute, Harvard Medical School, Boston, MA, USA, 02115

<sup>2</sup>Cancer Science Institute of Singapore, National University of Singapore, Singapore 117599

10 <sup>3</sup>Division of Hematology/Oncology, Beth Israel Deaconess Medical Center, Harvard Medical School, Boston, MA, USA, 02215

<sup>4</sup>Department of Biological Chemistry and Molecular Pharmacology, Harvard Medical School, Boston, MA, USA, 02115

<sup>5</sup>Department of Cancer Biology, Dana-Farber Cancer Institute, Boston, MA, USA, 02215

15 <sup>6</sup>Division of Endocrinology, Diabetes and Metabolism, Department of Medicine, Beth Israel Deaconess Medical Center, Harvard Medical School, Boston, MA, USA, 02215

\*Corresponding author. Email: [Daniel.tenen@csi.nus.edu](mailto:Daniel.tenen@csi.nus.edu)

†These two authors contribute equally to this work

20

**Abstract:** C/EBP $\alpha$  has known to be a transcription factor that involved in Neutrophil differentiation for decades. However, exploring the Chromatin RNA Immunoprecipitation Sequencing (RIP), we discover that C/EBP $\alpha$  is a RNA binding protein mainly interacts with RNA introns. Structure study and RNA electrophoretic mobility shift assay (REMSA) show that C/EBP $\alpha$  interacts with RNA through two novel RNA binding domains distinct from its DNA binding domain. Mouse bone marrow transplantation and *in vitro* cytokine assay reveal that C/EBP $\alpha$  RNA binding is critical for Macrophage differentiation but not Neutrophil differentiation. Mechanically, RNA binding domains control specific gene transcription. In particular, PU.1 intron 4 RNA interacts with C/EBP $\alpha$  and recruit C/EBP $\alpha$  to its enhancer site, which facilitate PU.1 expression. Taken together, C/EBP $\alpha$  is demonstrated to be a RNA binding protein with unique function distinct from its DNA binding activity. Our finding transforms our knowledge of transcriptional regulation by transcription factor.

**One-Sentence Summary:** C/EBP $\alpha$  interacts with RNA through novel RNA binding domains and regulates PU.1 expression during Macrophage differentiation.

## Introduction

Recent studies on non-canonical RNA binding proteins (RBP) has revealed the RNA binding activity in traditional DNA binding proteins (Di Ruscio et al., 2013; Holmes et al., 2020; Saldana-Meyer et al., 2019; Sigova et al., 2015; Wai et al., 2016; Xu et al., 2021). They may interact with RNA and DNA similarly or differently, and their RNA binding activity may support their role or provide different functions. For example, DNA methyltransferase 1 (DNMT1) interacts with non-coding RNA *ecC/EBP $\alpha$*  which inhibits its catalytic activity and transcriptional control (Di Ruscio et al., 2013). Transcription factor Yin-Yang 1 (YY1) interacts with RNA transcripts that enhances its occupancy on chromatin elements (Sigova et al., 2015; Wai et al., 2016). CCTTC-binding factor (CTCF) interacts with RNA through zinc finger domain and promotes long term chromatin interactions (Saldana-Meyer et al., 2019). All of these examples highlight the pleiotropic potential of RNA binding activity in regulating distinct functions of traditional DNA binding proteins.

CCAAT-enhancer binding protein alpha (C/EBP $\alpha$ ) is a canonical transcription factor which plays a non-redundant role in the transition from common myeloid progenitors (CMPs) to granulocyte macrophage progenitors (GMPs) (Zhang et al., 2004). Knockout C/EBP $\alpha$  in mice abolishes GMPs and results in a complete block of neutrophilic development (Zhang et al., 2004). In the past few decades, the comprehensive picture of C/EBP $\alpha$  function, predominantly focus on its DNA binding activity has merged. A crystal structure of C/EBP $\alpha$  C-terminal bZIP domain DNA binding complex has been shown (Miller et al., 2003; Vinson et al., 1989), and mutation on bZIP domain disrupts DNA binding and therefore disrupts C/EBP $\alpha$  function on inhibiting E2F1 and on inducing neutrophil differentiation (D'Alo et al., 2003; Porse et al., 2001). However, the study on C/EBP $\alpha$  N-terminal region is still limited. Additionally, previous study has shown that bZIP containing protein GCN4 and c-Jun is capable to bind to RNA (Nikolaev et al., 2010; Nikolaev and Pervushin, 2012), which drives a potential capability of C/EBP $\alpha$  RNA association. Taken together, the function of C/EBP $\alpha$  N-terminal region, and its capability and functionality in RNA binding is still remain unclear.

In this study, we surprisingly found that C/EBP $\alpha$  is an RBP which interacts with intron of RNA transcript. Employing alphaFold prediction and RNA electrophoretic mobility shift assay (REMSA), we identified two novel RNA binding domains located in N terminal region distinct from bZIP domain. Abolishing C/EBP $\alpha$  RNA binding activity affected macrophage differentiation but not neutrophil differentiation in bone marrow transplantation assay and in vitro cytokine assay. Mechanically, abolishing C/EBP $\alpha$  RNA binding activity decreased the recruitment of C/EBP $\alpha$  to PU.1 enhancer site, and downregulated PU.1 expression. Correspondingly, macrophage related genes such CD163, CD206, iNOS, IL1 $\beta$ , TNF $\alpha$ , IL10, Arg-1 and CCL-2 were also decreased. In the past few decades, C/EBP $\alpha$  is known as a major regulator for neutrophil (Ma et al., 2014; Zhang et al., 1997; Zhang et al., 1998; Zhang et al., 2004). The role of C/EBP $\alpha$  in macrophage differentiation is remain unclear. Our study shows C/EBP $\alpha$  is a non-canonical RBP involves in macrophage differentiation which transforms our knowledge underlying hematopoiesis.

## Results

### *C/EBP $\alpha$ is a RNA binding protein associated with RNA introns*

To investigate whether transcription factor C/EBP $\alpha$  also function as a RNA binding protein, we first performed C/EBP $\alpha$  chromatin RNA immunoprecipitation followed by RNA

sequencing (RIP-seq) (Fig. 1a) in both HL60 cells (Fig. 1b) and THP-1 cells (Fig. 1c). The results show that C/EBP $\alpha$  mainly interacts with introns of coding RNA. To validate the sequencing results, we first validated the specificity of C/EBP $\alpha$  antibody and ability to specifically immunoprecipitate C/EBP $\alpha$  with magnetic beads using western blot (fig. S1d). We next performed chromatin RNA immunoprecipitation followed by quantitative real time PCR (RIP-qRT-PCR) and UV-crosslinked RNA immunoprecipitation followed by quantitative real time PCR (CLIP-qRT-PCR). We first observed UV-crosslinked C/EBP $\alpha$  RNA complexes migrated in a less defined band, indicating crosslinked with heterogeneous RNAs (fig. S1a). PU.1, CTBP1, and NEAT1 were then selected as their peaks are significant higher compare to IgG control and Input (Fig. 1d). Enrichment of C/EBP $\alpha$  on positive binding region but not on negative binding region were observed in both RIP-qRT-PCR (Fig. 1e) and CLIP-qRT-PCR (fig. S1b-c). Interestingly, we identified three highly similar CA-rich motif, which occupied large percent of RIP-seq peaks (Fig. 1f). Importantly, these motifs were highly repeated in binding regions of targeted introns but not in other part of the introns (fig. S1e-f).

We further confirmed that C/EBP $\alpha$  is a RNA binding protein by observing direct RNA interaction between C/EBP $\alpha$  and RNA *in vitro*. We selected three small RNA probes from PU.1 intron 4 (Fig. 1g and fig. S1e) and CTBP1 intron 2 (Fig. 1g and fig. S1f) based on the CA-rich motif, and performed RNA electrophoretic mobility shift assay (REMSA) with bacteria purified recombinant C/EBP $\alpha$  proteins. We observed signal shift when linear RNA probes containing multiple repeat of CA-rich motif mixed with either C/EBP $\alpha$  p42 or p30 variants (Fig. 1h-i), and the shift signals disappear when unlabeled competitor was added to the mixture (Fig. 1h-i). Most importantly, there was no shift signal been observed when proteins was mixed with loop structured probe (Fig. 1i), suggesting that the CA-rich motif was more accessible in linear form of RNA. These data not only confirmed C/EBP $\alpha$  directly interacts with RNA but also suggest that C/EBP $\alpha$  may interacts with specific RNA introns during cellular process.

### ***C/EBP $\alpha$ interacts with RNA through N terminal region but not bZIP domain***

We next investigated which domain of C/EBP $\alpha$  is responsible for RNA binding. We first performed REMSA experiment by mixing RNA probes with different deletion mutation of C/EBP $\alpha$  (Fig. 2a). Unexpectedly, we observed shift signal in almost all the deletion mutations of C/EBP $\alpha$  except bZIP domain fragment (Fig. 2b-c), suggesting that bZIP domain of C/EBP $\alpha$  is not responsible for RNA binding. However, bZIP domain binds to neutrophil elastase promoter DNA very well (fig. S2a), indicating that the purified bZIP domain is functioning well. Unlike other transcription factor such as SOX2 or c-Jun which interacts RNA and DNA through same domain (Holmes et al., 2020; Nikolaev et al., 2010), C/EBP $\alpha$  tend to separate the RNA binding and DNA binding activity. To further confirm, we generated a C/EBP $\alpha$  basic domain mutation (BRM2) construct (Fig. 2a) which proved to reduce the DNA binding ability (Kowenz-Leutz et al., 2016). However we observed strong RNA binding activity in BRM2 mutation, further confirming that DNA binding activity and RNA binding activity of are separated in C/EBP $\alpha$ . As a control for REMSA, we also designed a DNA probe with the same sequence as the RNA probe, we observed minimum shift signal in DNA compare to RNA (Fig. 2b-c), suggesting that C/EBP $\alpha$  interacts with RNA specifically.

To further narrow down the RNA binding domain of C/EBP $\alpha$ , we performed a nuclear magnetic resonance (NMR) with C/EBP $\alpha$  N terminal region and RNA probe used in REMSA. Compare to C/EBP $\alpha$  along, we observed chemical shift when C/EBP $\alpha$  protein mixed with RNA (fig. S2b), confirming C/EBP $\alpha$  interacts with RNA directly *in vitro*. Unfortunately, NMR result show that C/EBP $\alpha$  N terminal is too dis-ordered in NMR buffer to assign the binding domain.

However, we still observed RNA binding activity, suggesting that C/EBP $\alpha$  RNA binding activity may not require a highly stable binding structure like its DNA binding activity (Miller et al., 2003).

We next performed AlphaFold prediction for C/EBP $\alpha$  RNA binding (Jumper et al., 2021). Interestingly, although the N terminal of C/EBP $\alpha$  is dis-ordered, we observed a RNA pocket formed within its N terminal region that was able to capture linear RNA (Fig. 2d). Based on the prediction, there were two small regions that was able to interact with RNA and was very important to maintain this RNA pocket (Fig. 2d). To validate the prediction, we purified several C/EBP $\alpha$  fragment (Fig. 2e) and performed REMSA experiment. Interestingly, we observed shift signal in two predicted fragments which are aa. 70-97 and aa. 159-182 but not in other fragments (Fig. 2f-g), indicating that C/EBP $\alpha$  interacts RNA through these two RNA binding domains. To further confirm, we overexpressed C/EBP $\alpha$  wild type or C/EBP $\alpha$  double RNA binding domain deletion mutation into HL-60 cells and performed RIP-qRT-PCR (fig. S2c), we observed that the RNA binding activity is disappear in C/EBP $\alpha$  double RNA binding domain deletion mutation. The pull down efficiency between wild type and mutation proteins were examined by western blot (fig. S2d). We next performed AlphaFold prediction again with C/EBP $\alpha$  double RNA binding domain deletion mutation, interestingly we observed collapse and closure of the RNA pocket (Fig. 2d). These data demonstrate two novel RNA binding domains localized in C/EBP $\alpha$  N terminal region.

### ***C/EBP $\alpha$ interacts with RNA and DNA with similar affinity***

Since C/EBP $\alpha$  interacts with RNA through novel RNA binding domains distinct from DNA binding, we were interested in measuring the affinity of this RNA binding. Isothermal titration calorimetry (ITC) was performed using C/EBP $\alpha$  RNA binding domains (Fig. 3a), we calculated *K<sub>d</sub>* of RNA binding domain 1 (aa. 70-97) is around 11.5  $\mu$ M and *K<sub>d</sub>* of RNA binding domain 2 (aa. 159-182) is around 16  $\mu$ M. The N terminal fragment that contains both RNA binding domains has the highest affinity with *K<sub>d</sub>* around 5.8  $\mu$ M. As a control, the non-RNA-binding fragments (aa. 1-70 and bZIP domain) did not show any binding activity on ITC (fig. S2e).

Since C/EBP $\alpha$  is able to bind both RNA and DNA, we compared the binding affinity between them by performing REMSA experiment. With increased amount of C/EBP $\alpha$  p42 (Fig. 3b) and C/EBP $\alpha$  p30 (Fig. 3c), we observed similar increase of shift signal and similar decrease of free probe signal, indicating that C/EBP $\alpha$  binds RNA and DNA with similar affinity. Additionally, C/EBP $\alpha$  BRM2 mutation (Fig. 3d) binds RNA with similar affinity with C/EBP $\alpha$  wild type variants, whereas its DNA binding affinity is much lower than wild type variants, further demonstrating that C/EBP $\alpha$  RNA binding activity and DNA binding activity are separate.

### ***C/EBP $\alpha$ RNA binding activity contribute to Macrophage differentiation but not Neutrophil differentiation***

We next investigated whether C/EBP $\alpha$  RNA binding activity is essential for hematopoiesis. We performed mouse bone marrow transplantation experiment. Lin<sup>-</sup>Sca-1<sup>+</sup>c-kit<sup>+</sup> cells (LSKs) isolated from poly (inosinic acid) poly (cytidylic acid) (poly I:C) treated Mx.1-Cre<sup>+</sup>C/EBP $\alpha$ <sup>fl/fl</sup> C/EBP $\alpha$  conditional knockout mice (KO) were transduced with MigR1-vector (vector), MigR1-C/EBP $\alpha$ -wild type-ER-IRES-GFP (WT), MigR1-C/EBP $\alpha$ - $\Delta$ 70-97+ $\Delta$ 159-182-ER-IRES-GFP ( $\Delta$ 70-97+ $\Delta$ 159-182), MigR1-C/EBP $\alpha$ - $\Delta$ 70-97-ER-IRES-GFP ( $\Delta$ 70-97) or MigR1-C/EBP $\alpha$ - $\Delta$ TADII-ER-IRES-GFP ( $\Delta$ TADII) retrovirus, and transplanted into lethally irradiated congenic recipients along with a radio-protective dose of congenic mice lineage depleted bone marrow cells (Fig. 4a). After reconstitution of the congenic blood system (fig. S3a), tamoxifen was feed to transplanted mice induce C/EBP $\alpha$ -ER translocation from cytoplasm to nuclear (Truong et al., 2003; Umek et al., 1991). Effect of C/EBP $\alpha$  on hematopoiesis was monitored by flow cytometry

of spleen and bone marrow (fig. S3b). Knockout of C/EBP $\alpha$  (KO) show complete loss of neutrophil population (CD11b<sup>high</sup>Ly6G<sup>+</sup>) (fig. S3b). Except vector control (n=6), myeloid cells population (CD11b<sup>intermediate-high</sup>B220<sup>-</sup>CD4<sup>-</sup>CD8<sup>-</sup>) were successfully rescued in spleen (fig. S4) and bone marrow (fig. S5) in both C/EBP $\alpha$  wild type (n=8) and deletion mutations. Additionally, RNA binding domain deletion mutation of C/EBP $\alpha$  ( $\Delta$ 70-97+ $\Delta$ 159-182) (n=6) was able to rescue neutrophil population at a similar level as C/EBP $\alpha$  wild type (fig. S6), suggesting that disrupting RNA binding activity has minor effect on neutrophil differentiation. Whereas disrupting DNA binding activity has a major effect on neutrophil differentiation, indicating that the function of C/EBP $\alpha$  RNA binding activity may distinct from its DNA binding activity.

We next investigated the macrophage differentiation among wild type and deletion mutations. Interestingly, the macrophage population (CD11b<sup>high</sup>CD115<sup>+</sup>F4/80<sup>high</sup>Ly6C<sup>low</sup>) rescued by C/EBP $\alpha$  wild type was disappeared and replaced by a monocyte population (CD11b<sup>intermediate</sup>CD115<sup>+</sup>F4/80<sup>-</sup>Ly6C<sup>high</sup>) in C/EBP $\alpha$  RNA binding domain deletions ( $\Delta$ 70-97+ $\Delta$ 159-182) in both spleen (Fig. 4b-c) and bone marrow (Fig. 4d-e), suggesting that C/EBP $\alpha$  RNA binding activity may essential for monocyte to macrophage differentiation. Furthermore, the C/EBP $\alpha$  single deletion mutations ( $\Delta$ 70-97 or  $\Delta$ TADII), which were capable of binding to RNA, were able to rescue macrophage population similar to C/EBP $\alpha$  wild type, suggesting that the regulation of macrophage differentiation is specific to RNA binding activity.

To further confirm, we next checked the expression of different macrophage related genes by qRT-PCR (Fig. 5) using sorted GFP positive spleen and bone marrow cell from bone marrow transplanted mice. We observed decrease of PU.1 expression, a transcription factor regulates macrophage differentiation (Dahl and Simon, 2003; Nagamura-Inoue et al., 2001), upon deletion of RNA binding domains (Fig. 5a). Besides, the macrophage regulated gene CD163 (Fig. 5b) and CD206 (Fig. 5c) (Murray et al., 2014) were also decreased upon RNA binding domains deletion. Furthermore, genes like iNOS, IL1 $\beta$ , TNF $\alpha$ , IL10, Arg-1 and CCL-2 which are important for macrophage function (Gordon and Martinez, 2010; Martinez et al., 2009; Sica and Mantovani, 2012) were also decreased upon RNA binding domains deletion (Fig. 5d). Taken together the disappearing of macrophage like cell when depleted RNA binding domains in giemsa staining of in vitro cytokine (MCSF/IL3) assay (Fig. 5e), and the decrease in CD11b (Fig. 5f) and F4/80 (Fig. 5g) in same cells. These results suggest that C/EBP $\alpha$  without RNA binding capability failed to induce functional macrophages.

### ***C/EBP $\alpha$ RNA binding activity facilitates C/EBP $\alpha$ recruitment to PU.1 enhancer***

PU.1 is essential for monocyte/macrophage differentiation and is regulated by C/EBP $\alpha$  through interacting with PU.1 enhancer (Yeaman et al., 2007), however how C/EBP $\alpha$  locate on specific site of PU.1 chromatin region is still remain unclear. Mouse primary GFP positive C/EBP $\alpha$  transplanted cells were sorted and ChIP-qRT-PCR was performed. Interestingly, enrichment of C/EBP $\alpha$  on PU.1 enhancer sites decreased upon RNA binding domain deletions (Fig. 6a). However, C/EBP $\alpha$  enrichment on C/EBPE and GCSFR sites, which are not C/EBP $\alpha$  RNA binding targets, are remain unchanged (Fig. 6a). Additionally, C/EBP $\alpha$  enrichment on PU.1 enhancer decreased upon overexpressing of C/EBP $\alpha$  double RNA binding domain deletion mutation in HL60 cells (fig. S7a-b).

Besides, we also generated an in vitro transcribed RNA competitor and transfected in HL60 cells. Upon RNA competitor treatment, C/EBP $\alpha$  RNA binding on PU.1 intron 4 decreased (Fig. 6b), and correspondingly C/EBP $\alpha$  enrichment on PU.1 enhancer site decreased as well (Fig. 6c). However, there is no change on negative binding site in both RIP-qRT-PCR (Fig. 6b) and ChIP-

qRT-PCR (Fig. 6c), suggesting that the change on binding site is specific. Correspondingly, PU.1 expression was also decreased upon RNA competitor treatment (Fig. 6d). Furthermore, we performed Phorbol 12-myristate 13-acetate (PMA) treatment assay in the context of with or without RNA competitor. PMA induced C/EBP $\alpha$  binding on PU.1 intron 4 RNA (fig. S7c) and PU.1 enhancer DNA (fig. S7d), and induced PU.1 expression (Fig. 6d). Interestingly, RNA competitor treatment blocked PMA induction on C/EBP $\alpha$  RNA binding (fig. S7c) and DNA binding (fig. S7d), and blocked PMA induction on PU.1 expression (Fig. 6d). The results suggested that C/EBP $\alpha$  RNA binding activity regulates the recruitment of C/EBP $\alpha$  to specific genome locus.

## Discussion

### *Role of C/EBP $\alpha$ RNA binding activity in transcription regulation underlying macrophage differentiation*

C/EBP $\alpha$  is known as a master transcription factor in neutrophil differentiation (Zhang et al., 1997; Zhang et al., 2004). Overexpressing C/EBP $\alpha$ -ER or C/EBP $\alpha$  bZIP domain mutation in cell line mainly affect neutrophil differentiation (D'Alo et al., 2003). However, C/EBP $\alpha$  express at a high level in monocyte/macrophage cells, indicating a potential role of C/EBP $\alpha$  in macrophage differentiation. Recent in vitro cell line studies have shown that C/EBP $\alpha$  regulates PU.1 expression through directly binds to PU.1 enhancer which may be important for monocyte differentiation (Yeaman et al., 2007). Additionally, overexpressing C/EBP $\alpha$  in *in vitro* cultured mouse primary B cell induces trans-differentiation into macrophage cells (Di Stefano et al., 2014; Hanna et al., 2008). Nonetheless, it remains poorly understood how C/EBP $\alpha$  promotes macrophage differentiation. Therefore it is intriguing to discover that the RNA binding activity of C/EBP $\alpha$  promotes macrophage differentiation which is mechanically and functionally different from its DNA binding activity. In our study, we identified two novel RNA binding domain located on N-terminal region of C/EBP $\alpha$ . Additionally, mouse in vivo bone marrow transplantation data showed that disrupt RNA binding activity mainly reduce macrophage population whereas has minor effect on neutrophil differentiation. Our findings provide a mechanistic explanation for the high level expression of C/EBP $\alpha$  in macrophage cells. Importantly, RNA binding function may also apply to other transcription factor, such as RUNX1 (Trinh et al., 2021) or PU.1, which may also play an important role in hematopoiesis. Our study extends our knowledge regarding the mechanically and functionally capability of transcription factor.

### *Transcription factor RNA binding activity facilitates its recruitment to specific genome locus*

C/EBP $\alpha$  mainly interacts with enhancer and promoter DNA through bZIP domain for transcription regulation (Pabst et al., 2001; Yeaman et al., 2007). Our study shows the importance of RNA binding activity of C/EBP $\alpha$  as another key determination in its transcription regulation. Emerging evidence has revealed the RNA binding capability of traditional DNA binding protein with various functions (Di Ruscio et al., 2013; Holmes et al., 2020; Nikolaev et al., 2010; Sigova et al., 2015; Wai et al., 2016). Genome-wide ChIP-seq and Gro-seq analysis revealed transcription factor YY1 interacts with RNA and DNA on same transcription element, indicating a potential role of RNA binding activity in transcription factor chromatin recruitment. Employing unbiased genome-wide chromatin RIP sequencing, we uncovered that C/EBP $\alpha$  mainly bond to intron of RNA transcript. ChIP-qPCR analysis revealed that disrupting RNA binding activity of C/EBP $\alpha$  through either deletion mutations or RNA competitor reduced C/EBP $\alpha$  enrichment on PU.1 enhancer. Correspondingly, PU.1 expression level decreased upon disrupting C/EBP $\alpha$  RNA

binding activity. Our study provide a novel mechanistic explanation on the dynamic recruitment of transcription factor to specific gene locus.



## Materials and methods

### *Animals*

5 All mice used in the study were housed in a sterile barrier facility approved by the IUCAC at the Beth Israel Deaconess Medical Center. Mx1-Cre mediated site-specific recombination of the LoxP cassettes in C/EBPa conditional knockout C57 mice has been generated and described in detail previously (REF). Cre<sup>+/+</sup>LoxP<sup>+/+</sup> mice were confirmed by analyzing genomic DNA isolated from tail. The primers used for genotyping were listed in Supplementary Table. 1. Phenotype of knockout of C/EBPa was confirmed by flow cytometry (Fig. S5).

10 B6.SJLPrca Pepcb/BoyJ (Pep Boy) congenic recipient mice were bred in lab.

Only male mice were used in the study.

### *Cell line*

15 HL60 cells were maintained in IMDM media (HyClone, Cat. No. SH30228.01) with 20% fetal bovine serum (Hyclone, Cat. No. SH30910.03). THP-1 cells were maintained in RPMI-1640 media (Corning, Cat. No. 10-040-CM) with 10% fetal bovine serum and 0.05 mM β-mercaptoethanol (Fisher scientific, Cat. No. BP176-100). K562 cells were maintained in RPMI-1640 media with 10% fetal bovine serum. 293T-ecotropic and 293T-Amphotropic were maintained in DMEM high glucose media (Corning, Cat. No. 10-013-CV) with 10% fetal bovine serum. All cells were incubated at 37 degrees Celsius and 5% CO<sub>2</sub>.

### *Chromatin RNA immunoprecipitation (RIP)*

25 50 million HL60 cells or THP-1 cells were suspended in 25 ml RPMI-1640 media without fetal bovine serum. 1.7 ml 16% formaldehyde (Thermo scientific, #28908) was added into cell solution (final concentration 1% formaldehyde) and shaken at room temperature for 10 min. Glycine (Fisher scientific, Cat. No. G48-212) was then added to a final concentration of 1.5 M to stop the crosslinking reaction. Crosslinked cells were washed twice with phosphate buffered saline (PBS) containing 5% vanadyl complex (New England Biolabs, Cat. No. S1492S) and 1 mM Phenylmethanesulfonyl fluoride (Sigma-Aldrich, Cat. No. P7626). After washing, cells were lysed in low salt lysis buffer [10 mM Tris-HCl pH7.4 (Thermo Fisher scientific, Cat. No. 17926), 10 mM NaCl (Sigma-Aldrich, Cat. No. S7653), 0.5% NP-40 (Sigma-Aldrich, Cat. No. I8896), 1X protease inhibitor (Roche, Cat. No. 11873580001), 1X Placental Rnase inhibitor (New England Biolabs, Cat. No. M0307L)] and then homogenized to isolate pure nuclei. Isolated nuclei were then lysed in high salt lysis buffer [50 mM HEPES (Fisher scientific, Cat. No. BP310-1), 1 mM MgCl<sub>2</sub> (Sigma-Aldrich, Cat. No. M8266S), 0.1 mM CaCl<sub>2</sub> (Sigma-Aldrich, Cat. No. 223506), 150 mM NaCl, 1% Triton-X100 (Sigma-Aldrich, Cat. No. T9284), 1% Sodium deoxycholate (Sigma-Aldrich, Cat. No. D6750), 1% Sodium dodecyl sulfate (SDS, Sigma-Aldrich, Cat. No. L3771), 1X protease inhibitor, 1X Placental Rnase inhibitor] and sonicated using Bioruptor 300 (Diagenode) at high intensity for 60 cycles with 15 seconds ON and 45 seconds OFF each cycle. Spin down and collect the supernatant, 5 μg antibody (Table. S3) and 50 μl protein A magnetic beads (New England Biolabs, Cat. No. S1425S) were added to the supernatant and incubate overnight at 4 degrees Celsius. Beads were washed 6 times with washing buffer (150 mM NaCl, 10 mM Tris-HCl pH 7.4, 1% Triton-X100, 0.5% NP-40, 1X protease inhibitor, 1X Placental Rnase inhibitor), and then elute and reverse crosslink by incubate overnight at 60 degrees Celsius in elution buffer [10

mM Tris-HCl pH 7.4, 10 mM EDTA (Sigma-Aldrich, Cat. No. E5134), 1% SDS, 200 mM NaCl, 200 µg protease K (Roche, Cat. No. 03115828001)]. Remove beads and collect supernatant, RNA was first isolated using phenol pH4 (Sigma-Aldrich, Cat. No. P4682) and ethanol. Isolated RNA was treatment with DNase I (Roche, Cat. No. 04716728001) at 37 degree Celsius for 30 minutes to remove any contaminate DNA. The RNA was purified again using phenol pH4 and ethanol. GlycoBlue (Invitrogen, Cat. No. AM9516) was added to help precipitating RNA.

### ***UV-crosslinked chromatin RNA immunoprecipitation (CLIP)***

50 million HL60 or THP-1 cells were washed once with PBS and reseed into 15 cm culture plate (Falcon Corning, Cat. No. 353025). Plates were placed on ice and removed lid for UV crosslink at 150 J/cm<sup>2</sup> using UV stratalinker 2400 (Agilent). After crosslink, cells were lysed in low salt lysis buffer (10 mM Tris-HCl pH7.4, 10 mM NaCl, 0.5% NP-40, 1X protease inhibitor, 1X Placental Rnase inhibitor) and dounce homogenized to isolate pure nuclei. Isolated nuclei were then lysed in high salt lysis buffer (50 mM HEPES, 1 mM MgCl<sub>2</sub>, 0.1 mM CaCl<sub>2</sub>, 150 mM NaCl, 1% Triton-X100, 1% Sodium deoxycholate, 1% SDS, 1X protease inhibitor, 1X Placental Rnase inhibitor) and sonicate using Bioruptor 300 (Diagenode) at high intensity for 60 cycles with 15 seconds ON and 45 seconds OFF each cycle. Spin down and collected the supernatant, 5 µg antibody (Table. S3) and 50 µl protein A magnetic beads were added to the supernatant and incubate overnight at 4 degree Celsius. Beads was washed 6 times with washing buffer (150 mM NaCl, 10 mM Tris-HCl pH 7.4, 1% Triton-X100, 0.5% NP-40, 1X protease inhibitor, 1X Placental Rnase inhibitor). Washed beads were then treated with Micrococcal nucleases (New England Biolab, Cat. No. M0247S) at 37 degree Celsius for 5 minutes. Reaction were stopped by stopping buffer [10 mM Tris-HCl pH 7.5, 50 mM NaCl, 1 mM EDTA, 50% Glycerol (Invitrogen, Cat. No. 15514-029)]. <sup>32</sup>P were then labeled to 5' end of digested RNA by T4 Polynucleotide Kinase (PNK) (New England Biolabs, Cat. No. M0201S). After labelling, beads were eluted in Nupage loading buffer (ThermoFisher Scientific, Cat. No. NP0007) at 70 degree Celsius for 10 minutes and directly run on SDS-PAGE gel. After running, protein-RNA complexes were transferred to nitrocellulose membrane (Bio-Rad, Cat. No. 1620112) for developing. Based on the developing results, cut out the membrane contains protein-RNA complex and incubate with protease K at 60 degree Celsius for 1 hour. Collect the supernatant and RNA was isolated using phenol pH4 and ethanol. GlycoBlue (ThermoFisher Scientific, Cat. No. AM9515) was added to help precipitating RNA. RNA obtained from CLIP was used in qRT-PCR not in RNA sequencing.

### ***Chromatin immunoprecipitation (ChIP)***

Three to five million cells were suspended in 15 ml serum free RPMI-1640 media. 1 ml 16% formaldehyde was added to cells and incubate 10 minutes at room temperature. Crosslinked cells were washed twitch with phosphate buffered saline and lysed in SDS lysis buffer (50 mM Tris-HCl pH 8.1, 10 mM EDTA, 1% SDS). The cells were then sonicate using Bioruptor 300 at high intensity for 60 cycles with 15 seconds ON and 45 seconds OFF each cycle. Spin down and collected supernatant, the supernatant was then diluted 10 times using ChIP dilution buffer (20 mM Tris-HCl pH 8.1, 150 mM NaCl, 1 mM EDTA, 1% Triton-X100). 5 µg antibody (Table. S3) and 50 µl protein A magnetic beads were added to the solution and incubate overnight at 4 degree Celsius. Beads were washed once with low salt wash buffer (20 mM Tris-HCl pH 8.1, 150 mM NaCl, 2 mM EDTA, 1% Triton-X100, 0.1% SDS), once with high salt wash buffer (20 mM Tris-HCl pH 8.1, 500 mM NaCl, 2 mM EDTA, 1% Triton-X100, 0.1% SDS), once with LiCl wash buffer [10 mM Tris-HCl pH 8.1, 1 mM EDTA, 1% Sodium deoxycholate, 1% NP-40, 250 mM

lithium chloride (Sigma-Aldrich, Cat. No. L9650)] and twice with TE buffer (10 mM Tris-HCl pH 8.1, 1 mM EDTA). Beads were then eluted and reverse crosslinked by incubate overnight at 60 degree Celsius in elution buffer (10 mM Tris-HCl pH 7.4, 10 mM EDTA, 1% SDS, 200 mM NaCl, 200 µg protease K). Beads were removed and DNA was isolated using PCR purification kit (Qiagen, Cat. No. 28104).

### ***Real time quantitative polymerase chain reaction (RT-qPCR)***

RNA obtained from RIP or CLIP, or mRNA isolated from cell lines or primary mouse cells were proceeded to RT-qPCR using iTaq universal SYBR green one step kit (Bio-Rad, Cat. No. 1725150). DNA obtained from ChIP was proceed to RT-qPCR using iQ SYBR green supermix (Bio-Rad, Cat. No. 1708880). Rotor-Gene 6000 platform (Corbett, US) was used for data acquisition and analysis. Primers were listed in Supplementary Table. 1.

### ***RNA sequencing (RNAseq)***

RNA obtained from RIP was proceed for RNAseq. RNAseq library was prepared using TruSeq stranded total RNA sample preparation kits (illumine, Cat. No. 20020597) following manufactory protocol. The library was validated on 2100 Bioanalyzer instrument (Agilent, Santa Clara, CA) and sequenced using Nextseq500.

### ***Protein purification***

His-tagged or His-sumo-tagged protein was purified using NiNTA beads (Anatrace, Cat. No. SUPER-NINTA25). Briefly, Bacteria transformed with expression constructs were cultured at 37 degree Celsius till OD600 reached 0.8 to 1.0. 1 mM IPTG (Sigma-Aldrich, Cat. No. I6758) was added to bacteria culture and incubate overnight at room temperature. Next day, bacteria cells were spin down and suspended in buffer H (50 mM Tris-HCl pH 8.0, 150 mM NaCl, 10% Glycerol) containing 1 mg/ml lysozyme (Bio Basic, Cat. No. LDB0308-5) and 0.1 % TritonX-100. Cells were incubated on ice for 30 minutes and sonicate using sonic dismembrator model 500 (fisher scientific) for 20 minutes (30s ON, 30s OFF, 30% amplitude). The solution became transparent after sonication, then spin down at 13,000 rpm for 15 minutes. Collect supernatant and added 1 ml NiNTA beads (50% slurry, washed 3 times using buffer H). Incubated at 4 degree Celsius for 2 hours. Beads were then washed twice with buffer H containing 20 mM imidazole (Sigma-Aldrich, Cat. No. I2399) and twice with buffer H containing 40 mM imidazole. Washed beads were eluted using buffer H containing 300 mM imidazole. Eluted protein was dialyzed into different buffers based on following experiments using snakeskin dialysis tubing 3.5K MWCO 16 mm (Thermo scientific, Cat. No. 88242).

For RNA EMSA, protein was dialyzed into REMSA buffer [10mM HEPES pH 7.3 (Sigma-Aldrich, Cat. No. H3375), 20 mM KCl (Fisher Scientific, Cat. No. P217), 1 mM MgCl<sub>2</sub>, 1 mM DTT (GoldBio, Cat. No. DTT10), 1 mM EDTA, 10% Glycerol].

For ITC, protein was dialyzed into ITC buffer (20 mM HEPES pH 7.5, 150 mM NaCl, 1 mM MgCl<sub>2</sub>, 2 mM DTT).

For NMR, protein was dialyzed into NMR buffer [30 mM phosphate buffer pH 7.4 (22.6 mM Na<sub>2</sub>HPO<sub>4</sub> (Sigma-Aldrich, Cat. No. S9763) and 7.4 mM NaH<sub>2</sub>PO<sub>4</sub> (Sigma-Aldrich, Cat. No. S0751), 150 mM NaCl, 1 mM MgCl<sub>2</sub>, 2 mM DTT].

## 5 ***Transfection and retrovirus stock preparation***

Retrovirus plasmids were transfected into 293T-Eco cells using Lipofectamine 2000 (Thermo scientific, Cat. No. 11668019). 48 hours post transfection, supernatant was harvested and filtered by 0.45 μm hydrophilic PVDF filter (Foxy life science, Cat. No. 378-3415-OEM). Retro-X concentrator (Takara, Cat. No. 631456) was added to filtered supernatant at a ratio 1:3 and incubated overnight at 4 degree Celsius. After incubation, spindown and suspended the virus pallet in 500 μl StemSpan SFEM serum free media (stemcell technologies, Cat. No. 09650). Make a small aliquot for virus titration using qPCR titration kit (abm, Cat. No. G949). The remaining virus was put in -80 degree celsius freezer.

## 15 ***Retrovirus transduction and bone marrow transplantation assay***

C/EBPα<sup>ff</sup> Mx1-Cre<sup>+</sup> mice were intraperitoneal injected 30 μg Poly I:C (Sigma-Aldrich, Cat. No. P0913) per gram of mouse weight every alternative day for 18 days to induce C/EBPα conditional knockout. Two tibia, two femur and two pelvis were harvested from each knockout mice. Bone marrow cells were isolated from each bones and proceed to lineage depletion using direct lineage depletion kit (Milenyi Biotec, Cat. No. 130-110-470). Cells were then stained with antibody (Supplementary Table. 2) and LSK cells were isolated through cell sorting using FACSaria (BD). Sorted LSK cells were cultured in StemSpan SFEM serum free media (stemcell technologies) contains 40 ng/ml mSCF (Biolegend, Cat. No. 579702), 40 ng/ml mTPO (Biolegend, Cat. No. 593302) and 10 ng/ml IL3 (Biolegend, Cat. No. 575502) for virus transduction. 200 MOI retrovirus and 5 μg/cm<sup>2</sup> RetroNectin reagent (Takara, Cat. No. T100A) were used in the transduction following the manufactory protocol. 48 hours post transduction, 1 × 10<sup>5</sup> LSK cells per mouse were injected into lethally irradiated (1000 cGy) B6.SJLPtprca Pepcb/BoyJ (Pep Boy) congenic recipients along with 1 × 10<sup>5</sup> lineage depleted Pep boy bone marrow cells for radioprotection.

## 30 ***Flow cytometry (FACS)***

35 Single-cell suspension isolated from various organs were analyzed by FACS. Antibody used were listed in Supplementary Table. 2. Stained cells were analyzed using LSRII flow cytometer (BD Biosciences, San Jose, CA), LSR fortessa flow cytometer (BD) or CytoFLEX LX flow cytometer (BECKMAN COULTER life sciences, Indianapolis, IN). DIVE software (BD), CytoExpert (Beckman) and FlowJo V10 (Tree Star) were used for data acquisition and analysis.

## 40 ***Primary cell sorting***

45 Single-cell suspension received from primary cell isolation were proceeded to cell sorting. Antibody used were listed in Supplementary Table. 2. Stained cell were suspended at a concentration of 20 million cell per milliliter in phosphate-buffered saline (PBS) plus 0.5% fetal bovine serum (FBS). LSK cell or GFP positive CD45.2 cell were obtained using FACSaria (BD).

## ***Western blot***

Cells were lysed using 1X RIPA buffer (ThermoFisher Scientific, Cat. No. 89900) with 1X protease inhibitor cocktail follow by 3 times sonication (Sonic Dismembrator Model 100, Fisher Scientific, Waltham, MA) with 10 seconds each time at intensity level 3. Protein was quantified using BCA protein assay kit (Thermo scientific, Cat. No. 23227) following the manufactory protocol. Protein lysates were separated on 10% self-made Bis-tris gel and transferred to nitrocellulose membranes. The membrane was blocked by 5% Bovine Serum Albumin (bioworld, Cat. No. 22070008) in 1X TBST for 1 hour at room temperature and incubated with primary antibody (Supplementary Table. 2) overnight at 4 degree Celsius. The membrane was then incubated with Secondary antibody (Supplementary Table. 2) 1 hour at room temperature, developed using reagent (ThermoFisher Scientific, Cat. No. 34580), and observed on Amersham Imager 600 (GE Healthcare).

### ***RNA electrophoretic mobility shift assay***

C/EBP $\alpha$  full length and mutations were purified from bacteria and dialyzed in REMSA buffer. 19-21 bp RNA probe were obtained from PU.1 intron 4 (PU.1i4): CCCCCACCCAGCCAGGCCAAC and CTBP1 intron 2 (CTBP1i2): UUCCACUCACCCAGCACCC. A negative binding probe was also obtained from CTBP1 intron 2 (CTBP1i2N): GGGACCCGGUCCCCACUCACCCAGC. RNA probes were purchased from Sigma-Aldrich and proceed to 5'end <sup>32</sup>P labelling using PNK. After labelling, labelled probe was purified by native TBE-PAGE gel and illustra G-25 columns (GE Healthcare, Cat. No. 27532501). Equal intensity of different RNA probes were mixed with equal molar of different C/EBP $\alpha$  proteins individually in EMSA buffer B1 (Active Motif, Cat. No. 37480), stabilizing solution D (Active Motif, Cat. No. 37488) and buffer C1 (Active Motif, Cat. No. 37484). After incubating on ice for 10 minutes, the mixture was running on 4% native TBE-PAGE gel. After running, gel was fixed by fixing buffer [20% Methanol (Pharmco, Cat. No. 339000000), 10% Acetic acid (Sigma-Aldrich, Cat. No. 695092)] and dried on Model 583 gel dryer (Bio-Rad). The dried gel was then developed directly using X-ray film (MTC bio, Cat. No. A8815). For overnight exposure, the cassette was put in -80 degree Celsius freezer.

### ***In vitro transcription and electroporation***

Linearized DNA plasmids were proceeded to in vitro transcription using MAXIscript SP6 transcription kit (ThermoFisher Scientific, Cat. No. AM1308). After reaction, DNase I was added to remove template DNA. RNA was isolated by phenol pH4 and ethanol. The quality of RNA was examined by running 2% agarose gel. The sequence of RNA are as follow: RNA competitor: 5'-ACC CTG GCC CCG ACC CTG GCC GTG TCT GTG CCC TGC CCC CAC CCA GCC AGG CCA ACT GAC CCA GCA GCC A-3'; Scramble (anti-sense): 5'-TGG CTG CTG GGT CAG TTG GCC TGG CTG GGT GGG GGC AGG GCA CAG ACA CGG CCA GGG TCG GGG CCA GGG T-3'.

Electroporation was performed using nucleofector kit V (Lonza, Cat. No. VCA-1003) and Amaxa nucleofector II electropotator (Lonza) following the manufactory protocol. 2 million HL60 cells and 5  $\mu$ g in vitro transcribed RNA were used. 24 hours post electroporation, cells were harvested for CHIP, RIP and qRT-PCR.

## References

- D'Alo, F., Johansen, L.M., Nelson, E.A., Radomska, H.S., Evans, E.K., Zhang, P., Nerlov, C., and Tenen, D.G. (2003). The amino terminal and E2F interaction domains are critical for C/EBP alpha-mediated induction of granulopoietic development of hematopoietic cells. *Blood* *102*, 3163-3171.
- Dahl, R., and Simon, M.C. (2003). The importance of PU.1 concentration in hematopoietic lineage commitment and maturation. *Blood Cells Mol Dis* *31*, 229-233.
- Di Ruscio, A., Ebralidze, A.K., Benoukraf, T., Amabile, G., Goff, L.A., Terragni, J., Figueroa, M.E., De Figueiredo Pontes, L.L., Alberich-Jorda, M., Zhang, P., *et al.* (2013). DNMT1-interacting RNAs block gene-specific DNA methylation. *Nature* *503*, 371-376.
- Di Stefano, B., Sardina, J.L., van Oevelen, C., Collombet, S., Kallin, E.M., Vicent, G.P., Lu, J., Thieffry, D., Beato, M., and Graf, T. (2014). C/EBPalpha poises B cells for rapid reprogramming into induced pluripotent stem cells. *Nature* *506*, 235-239.
- Gordon, S., and Martinez, F.O. (2010). Alternative activation of macrophages: mechanism and functions. *Immunity* *32*, 593-604.
- Hanna, J., Markoulaki, S., Schorderet, P., Carey, B.W., Beard, C., Wernig, M., Creighton, M.P., Steine, E.J., Cassady, J.P., Foreman, R., *et al.* (2008). Direct reprogramming of terminally differentiated mature B lymphocytes to pluripotency. *Cell* *133*, 250-264.
- Holmes, Z.E., Hamilton, D.J., Hwang, T., Parsonnet, N.V., Rinn, J.L., Wuttke, D.S., and Batey, R.T. (2020). The Sox2 transcription factor binds RNA. *Nat Commun* *11*, 1805.
- Jumper, J., Evans, R., Pritzel, A., Green, T., Figurnov, M., Ronneberger, O., Tunyasuvunakool, K., Bates, R., Zidek, A., Potapenko, A., *et al.* (2021). Highly accurate protein structure prediction with AlphaFold. *Nature* *596*, 583-589.
- Kowenz-Leutz, E., Schuetz, A., Liu, Q., Knoblich, M., Heinemann, U., and Leutz, A. (2016). Functional interaction of CCAAT/enhancer-binding-protein-alpha basic region mutants with E2F transcription factors and DNA. *Biochim Biophys Acta* *1859*, 841-847.
- Ma, O., Hong, S., Guo, H., Ghiaur, G., and Friedman, A.D. (2014). Granulopoiesis requires increased C/EBPalpha compared to monopoiesis, correlated with elevated Cebpa in immature G-CSF receptor versus M-CSF receptor expressing cells. *PLoS One* *9*, e95784.
- Martinez, F.O., Helming, L., and Gordon, S. (2009). Alternative activation of macrophages: an immunologic functional perspective. *Annu Rev Immunol* *27*, 451-483.
- Miller, M., Shuman, J.D., Sebastian, T., Dauter, Z., and Johnson, P.F. (2003). Structural basis for DNA recognition by the basic region leucine zipper transcription factor CCAAT/enhancer-binding protein alpha. *J Biol Chem* *278*, 15178-15184.
- Murray, P.J., Allen, J.E., Biswas, S.K., Fisher, E.A., Gilroy, D.W., Goerdt, S., Gordon, S., Hamilton, J.A., Ivashkiv, L.B., Lawrence, T., *et al.* (2014). Macrophage activation and polarization: nomenclature and experimental guidelines. *Immunity* *41*, 14-20.
- Nagamura-Inoue, T., Tamura, T., and Ozato, K. (2001). Transcription factors that regulate growth and differentiation of myeloid cells. *Int Rev Immunol* *20*, 83-105.
- Nikolaev, Y., Deillon, C., Hoffmann, S.R., Bigler, L., Friess, S., Zenobi, R., Pervushin, K., Hunziker, P., and Gutte, B. (2010). The leucine zipper domains of the transcription factors GCN4 and c-Jun have ribonuclease activity. *PLoS One* *5*, e10765.
- Nikolaev, Y., and Pervushin, K. (2012). Structural basis of RNA binding by leucine zipper GCN4. *Protein Sci* *21*, 667-676.
- Pabst, T., Mueller, B.U., Zhang, P., Radomska, H.S., Narravula, S., Schnittger, S., Behre, G., Hiddemann, W., and Tenen, D.G. (2001). Dominant-negative mutations of CEBPA, encoding

CCAAT/enhancer binding protein-alpha (C/EBPalpha), in acute myeloid leukemia. *Nat Genet* 27, 263-270.

Porse, B.T., Pedersen, T.A., Xu, X., Lindberg, B., Wewer, U.M., Friis-Hansen, L., and Nerlov, C. (2001). E2F repression by C/EBPalpha is required for adipogenesis and granulopoiesis in vivo. *Cell* 107, 247-258.

Saldana-Meyer, R., Rodriguez-Hernaez, J., Escobar, T., Nishana, M., Jacome-Lopez, K., Nora, E.P., Bruneau, B.G., Tsigos, A., Furlan-Magaril, M., Skok, J., *et al.* (2019). RNA Interactions Are Essential for CTCF-Mediated Genome Organization. *Mol Cell* 76, 412-422 e415.

Sica, A., and Mantovani, A. (2012). Macrophage plasticity and polarization: in vivo veritas. *J Clin Invest* 122, 787-795.

Sigova, A.A., Abraham, B.J., Ji, X., Molinie, B., Hannett, N.M., Guo, Y.E., Jangi, M., Giallourakis, C.C., Sharp, P.A., and Young, R.A. (2015). Transcription factor trapping by RNA in gene regulatory elements. *Science* 350, 978-981.

Trinh, B.Q., Ummarino, S., Zhang, Y., Ebraldize, A.K., Bassal, M.A., Nguyen, T.M., Heller, G., Coffey, R., Tenen, D.E., van der Kouwe, E., *et al.* (2021). Myeloid lncRNA LOUP mediates opposing regulatory effects of RUNX1 and RUNX1-ETO in t(8;21) AML. *Blood* 138, 1331-1344.

Truong, B.T., Lee, Y.J., Lodie, T.A., Park, D.J., Perrotti, D., Watanabe, N., Koeffler, H.P., Nakajima, H., Tenen, D.G., and Kogan, S.C. (2003). CCAAT/Enhancer binding proteins repress the leukemic phenotype of acute myeloid leukemia. *Blood* 101, 1141-1148.

Umek, R.M., Friedman, A.D., and McKnight, S.L. (1991). CCAAT-enhancer binding protein: a component of a differentiation switch. *Science* 251, 288-292.

Vinson, C.R., Sigler, P.B., and McKnight, S.L. (1989). Scissors-grip model for DNA recognition by a family of leucine zipper proteins. *Science* 246, 911-916.

Wai, D.C., Shihab, M., Low, J.K., and Mackay, J.P. (2016). The zinc fingers of YY1 bind single-stranded RNA with low sequence specificity. *Nucleic Acids Res* 44, 9153-9165.

Xu, Y., Huangyang, P., Wang, Y., Xue, L., Devericks, E., Nguyen, H.G., Yu, X., Oses-Prieto, J.A., Burlingame, A.L., Miglani, S., *et al.* (2021). ERalpha is an RNA-binding protein sustaining tumor cell survival and drug resistance. *Cell* 184, 5215-5229 e5217.

Yeaman, C., Wang, D., Paz-Priel, I., Torbett, B.E., Tenen, D.G., and Friedman, A.D. (2007). C/EBPalpha binds and activates the PU.1 distal enhancer to induce monocyte lineage commitment. *Blood* 110, 3136-3142.

Zhang, D.E., Zhang, P., Wang, N.D., Hetherington, C.J., Darlington, G.J., and Tenen, D.G. (1997). Absence of granulocyte colony-stimulating factor signaling and neutrophil development in CCAAT enhancer binding protein alpha-deficient mice. *Proc Natl Acad Sci U S A* 94, 569-574.

Zhang, P., Iwama, A., Datta, M.W., Darlington, G.J., Link, D.C., and Tenen, D.G. (1998). Upregulation of interleukin 6 and granulocyte colony-stimulating factor receptors by transcription factor CCAAT enhancer binding protein alpha (C/EBP alpha) is critical for granulopoiesis. *J Exp Med* 188, 1173-1184.

Zhang, P., Iwasaki-Arai, J., Iwasaki, H., Fenyus, M.L., Dayaram, T., Owens, B.M., Shigematsu, H., Levantini, E., Huettner, C.S., Lekstrom-Himes, J.A., *et al.* (2004). Enhancement of hematopoietic stem cell repopulating capacity and self-renewal in the absence of the transcription factor C/EBP alpha. *Immunity* 21, 853-863.

Figure 1

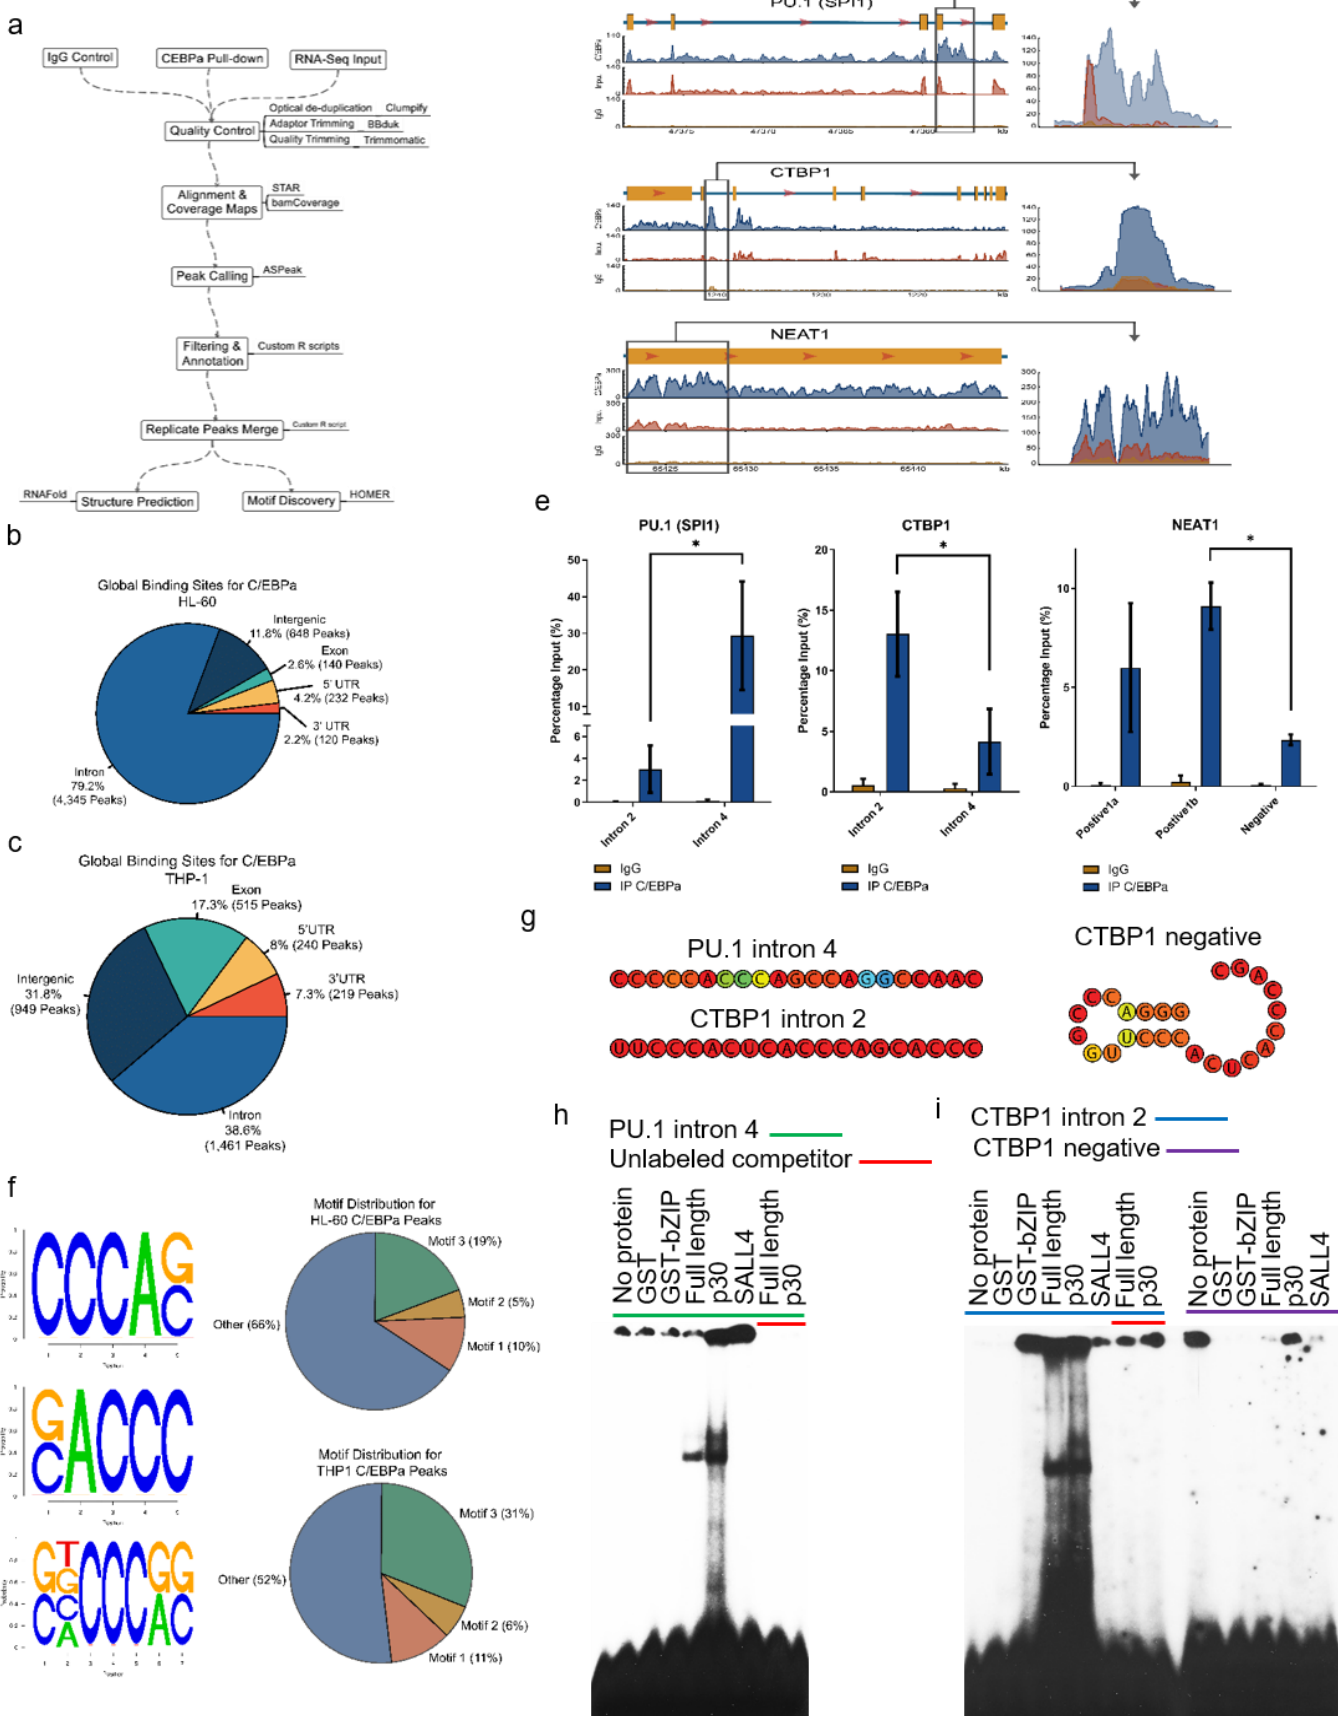



**Figure. 1.** C/EBP $\alpha$  binds intron of RNA transcript directly. (a) Pipeline of chromatin RNA immunoprecipitation (RIP) analysis. (b, c) Pie chart showing C/EBP $\alpha$  mainly interacts with RNA introns in both HL60 cells (b) and THP-1 cells (c). (d) Representative peaks of C/EBP $\alpha$  RNA binding on PU.1 intron 4 (upper), CTBP1 intron 2 (middle) and NEAT1 (down) viewed on IGV. (e) RIP-qRT-PCR validate of C/EBP $\alpha$  enrichment on PU.1 intron 4 (left), CTBP1 intron 2 (middle) and NEAT1 (right) RNAs. C/EBP $\alpha$  enrichment was shown on positive region but no on negative region. (f) Pie chart showing the CA-rich binding motif (left) occupied large percent of C/EBP $\alpha$  RIP peaks in both HL60 cells (upper) and THP-1 cells (down). (g) Sequence and predict structure of RNA probes used in REMSA. (h, i) REMSA blots show both C/EBP $\alpha$  p42 and p30 isoforms interact with PU.1 intron 4 RNA (h) and CTBP1 intron 2 RNA (i) directly *in vitro*, but not interacts with CTBP1 negative probe (i).

Figure 2

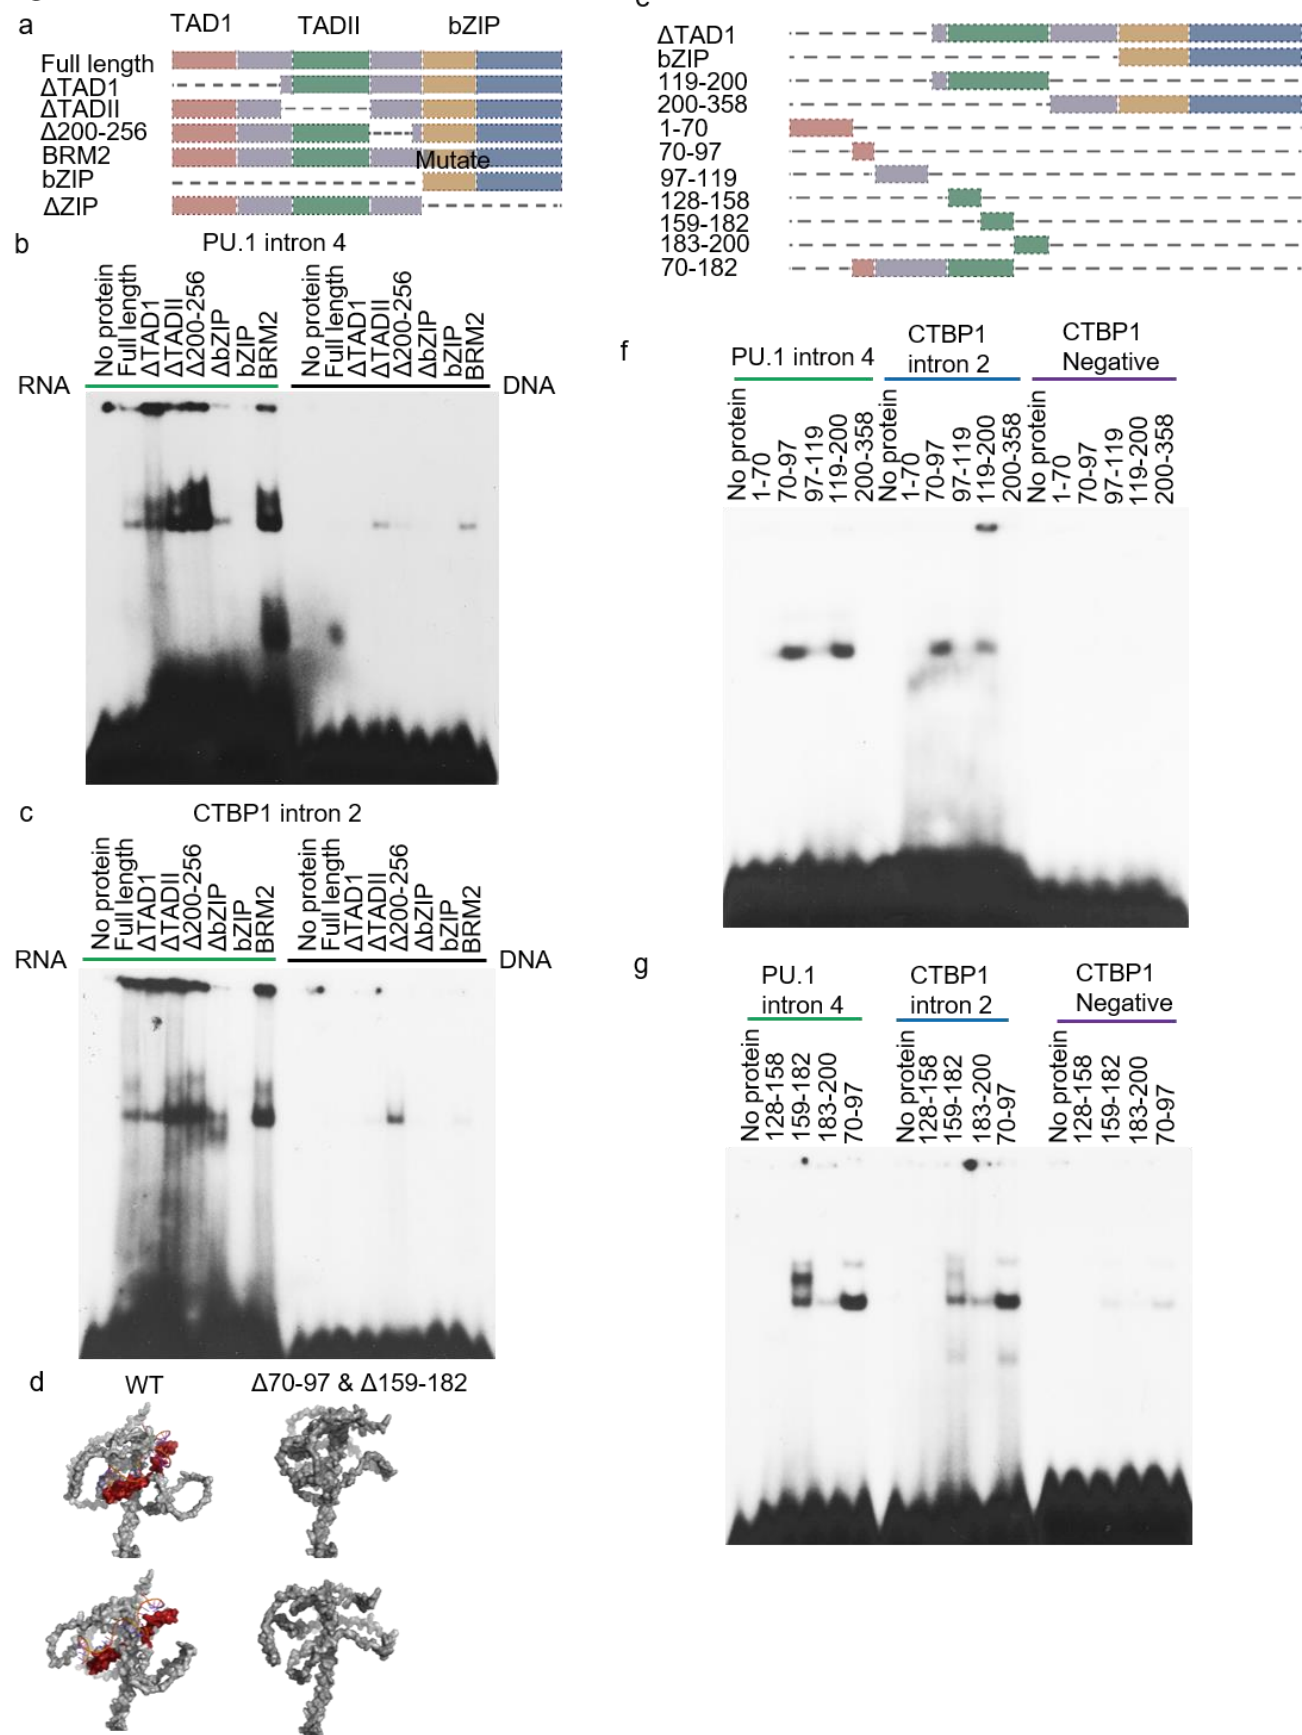

**Figure. 2.** C/EBP $\alpha$  interacts with RNA through two novel RNA binding domain located in N-terminal region but not through bZIP domain. (a) Schematic shows C/EBP $\alpha$  single domain deletions. (b, c) REMSA blot show C/EBP $\alpha$  bZIP domain is not responsible for RNA binding of PU.1 intron 4 (b) and CTBP1 intron 2 (c). DNA probes contains exactly same sequence of RNA probe, no binding was observed on these DNA probes indicating the specificity of C/EBP $\alpha$  RNA binding. (d) AlphaFold prediction of the structure of C/EBP $\alpha$ -RNA binding complex indicate the two novel RNA binding domain (aa. 70-97 and aa. 150-182). Left: C/EBP $\alpha$  wild type which shows a unique RNA pocket. Right: C/EBP $\alpha$  RNA binding domain deletion which shows close and collapse of RNA pocket. (e) Schematic shows C/EBP $\alpha$  fragments. (f, g) REMSA shows C/EBP $\alpha$  aa. 70-97 and aa. 159-182 interacts with RNA directly *in vitro*.

Figure 3

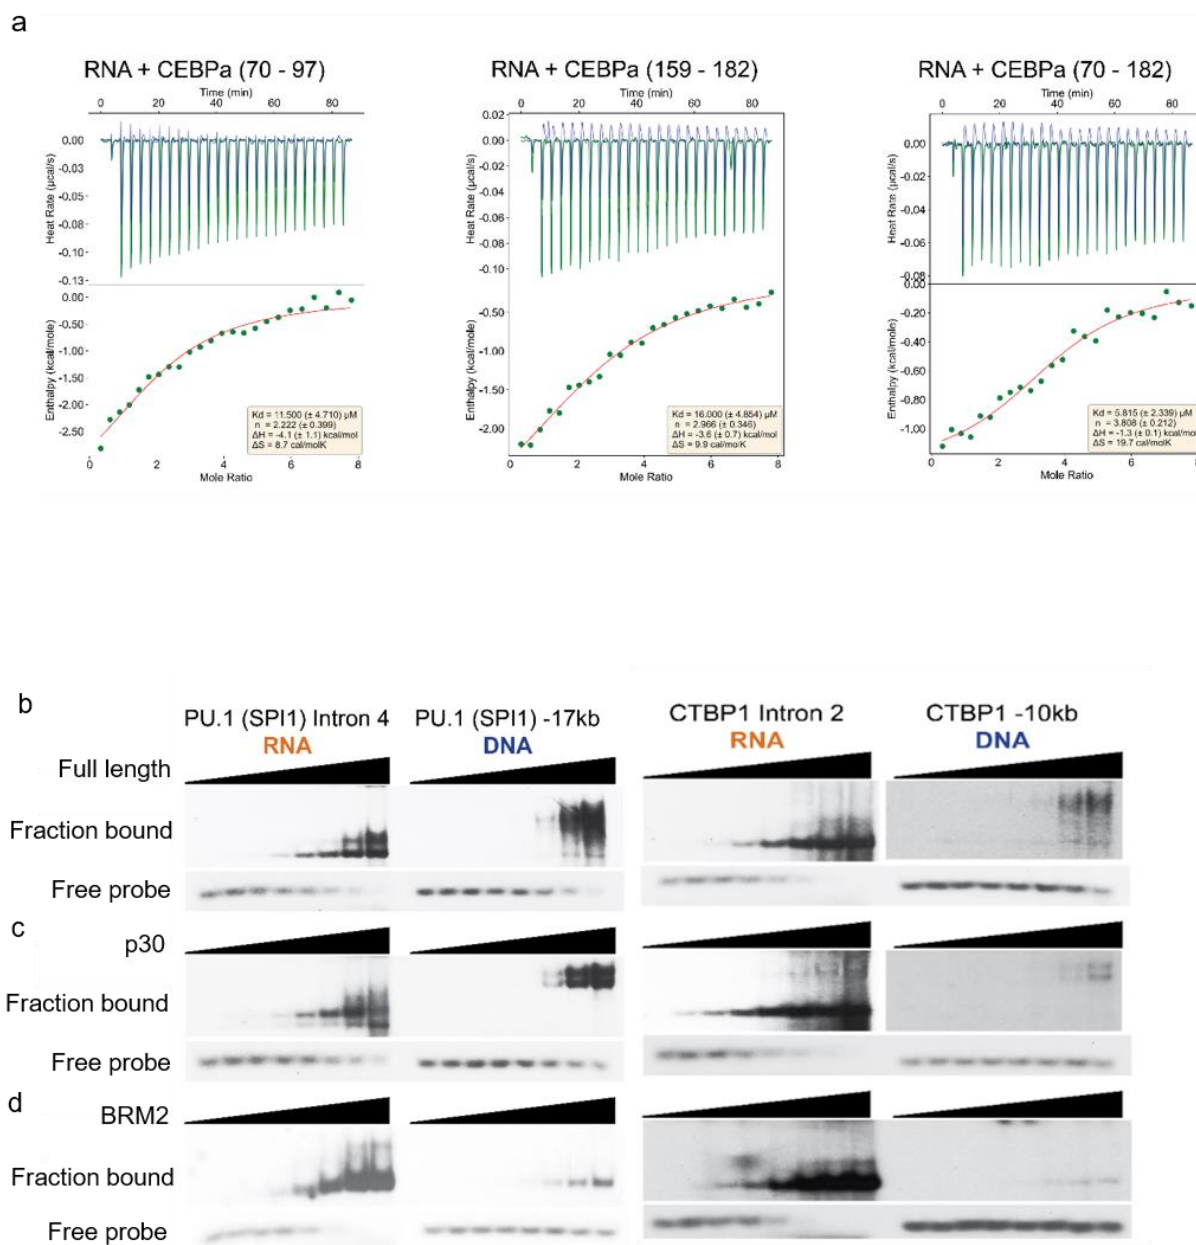

**Figure 3.** C/EBP $\alpha$  binds RNA and DNA with similar affinity. (a) Isothermal titration calorimetry (ITC) affinity calculation of C/EBP $\alpha$  RNA binding domain binds to RNA. aa. 70-97  $K_d$  11.5  $\mu$ M (left), aa. 159-182  $K_d$  16  $\mu$ M (middle), aa. 70-182  $K_d$  5.8  $\mu$ M (right). (b, c) REMSA blot shows similar binding affinity of C/EBP $\alpha$  full length (b) and p30 (c) between RNA and DNA. (d) REMSA blot shows C/EBP $\alpha$  BRM2 mutation reduce DNA binding but has no effect on RNA binding.

Figure 4

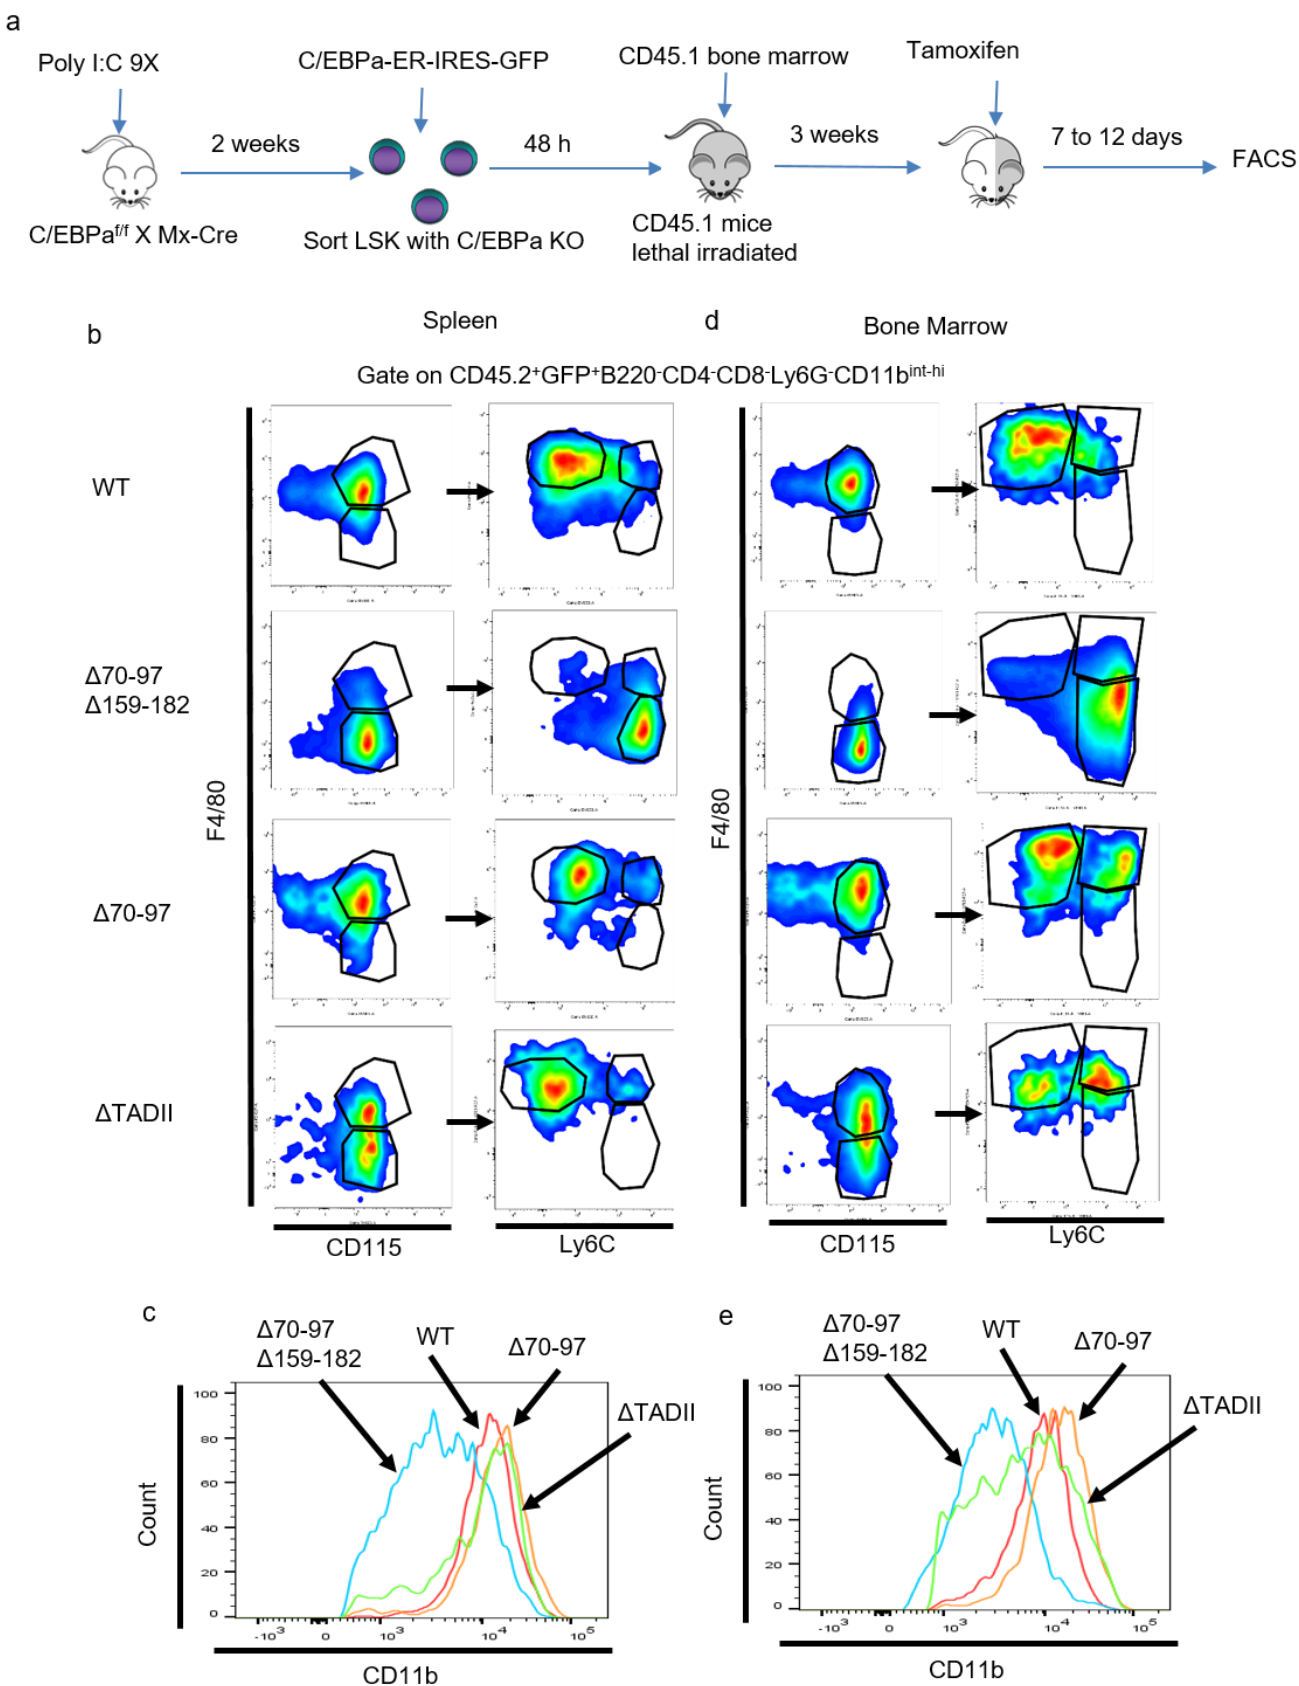

**Figure. 4.** C/EBP $\alpha$  RNA binding affinity mainly affect macrophage population *in vivo*. (a) Experiment procedure of mouse bone marrow transplantation experiment. (b, c) Decrease of macrophage population F4/80<sup>+</sup>CD115<sup>+</sup>Ly6C<sup>low</sup> (b) and CD11b level (c) upon double RNA binding domain deletion but not upon single deletion in spleen. (d, e) Decrease of macrophage population F4/80<sup>+</sup>CD115<sup>+</sup>Ly6C<sup>low</sup> (d) and CD11b level (e) upon double RNA binding domain deletion but not upon single deletion in bone marrow.

Figure 5

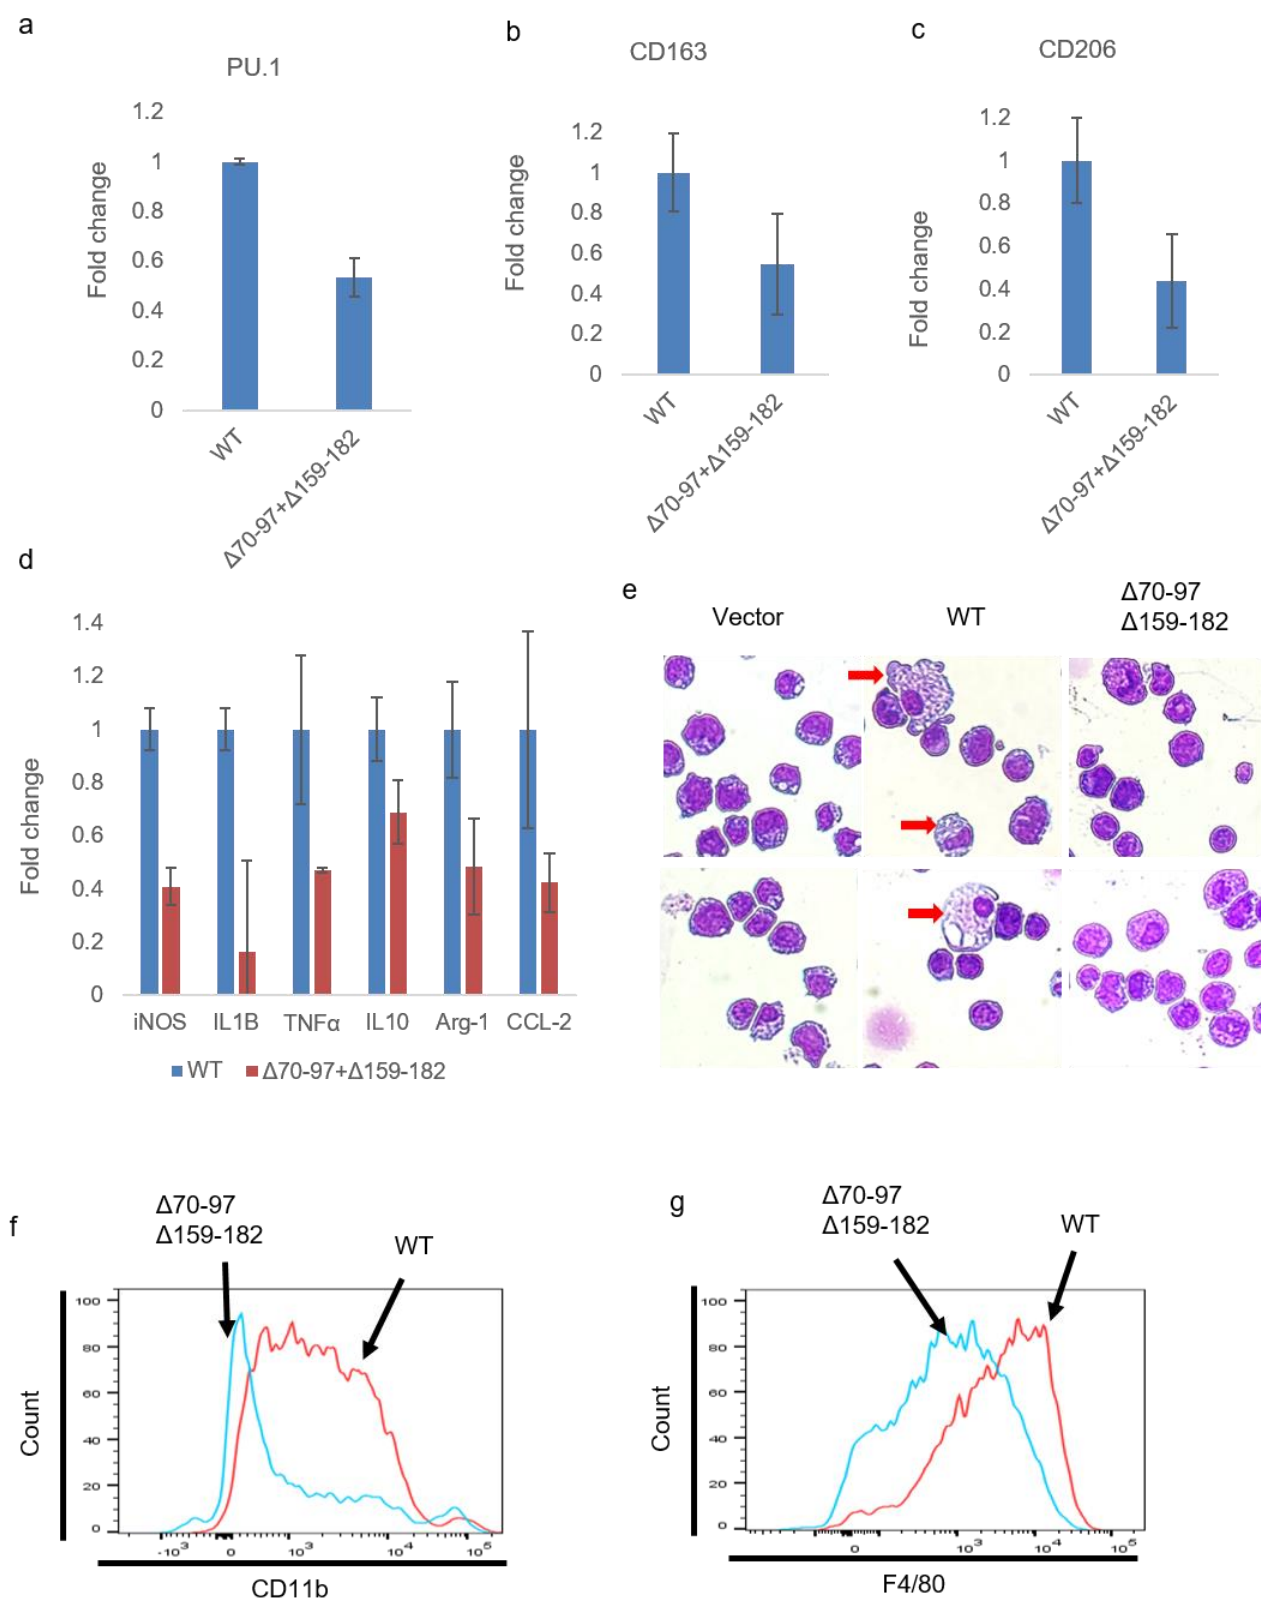

**Figure. 5.** C/EBP $\alpha$  RNA binding activity regulates expression of macrophage related gene and promotes macrophage differentiation *in vitro*. (a-c) qRT-PCR analysis of GFP positive transplanted mouse primary spleen and bone marrow cells shows decrease expression of macrophage markers upon RNA binding domains deletion. PU.1 (a), CD163 (b), CD206 (c). (d) qRT-PCR analysis of GFP positive transplanted mouse primary spleen and bone marrow cells shows decrease expression of macrophage functional related gene upon RNA binding domains deletion. (e) Giemsa staining shows C/EBP $\alpha$  failed to induce macrophage like cells as C/EBP $\alpha$  did. (f, g) FACS analysis shows decrease of CD11b level (f) and F4/80 level (g) upon RNA binding domains deletion.

5

10



Figure 6

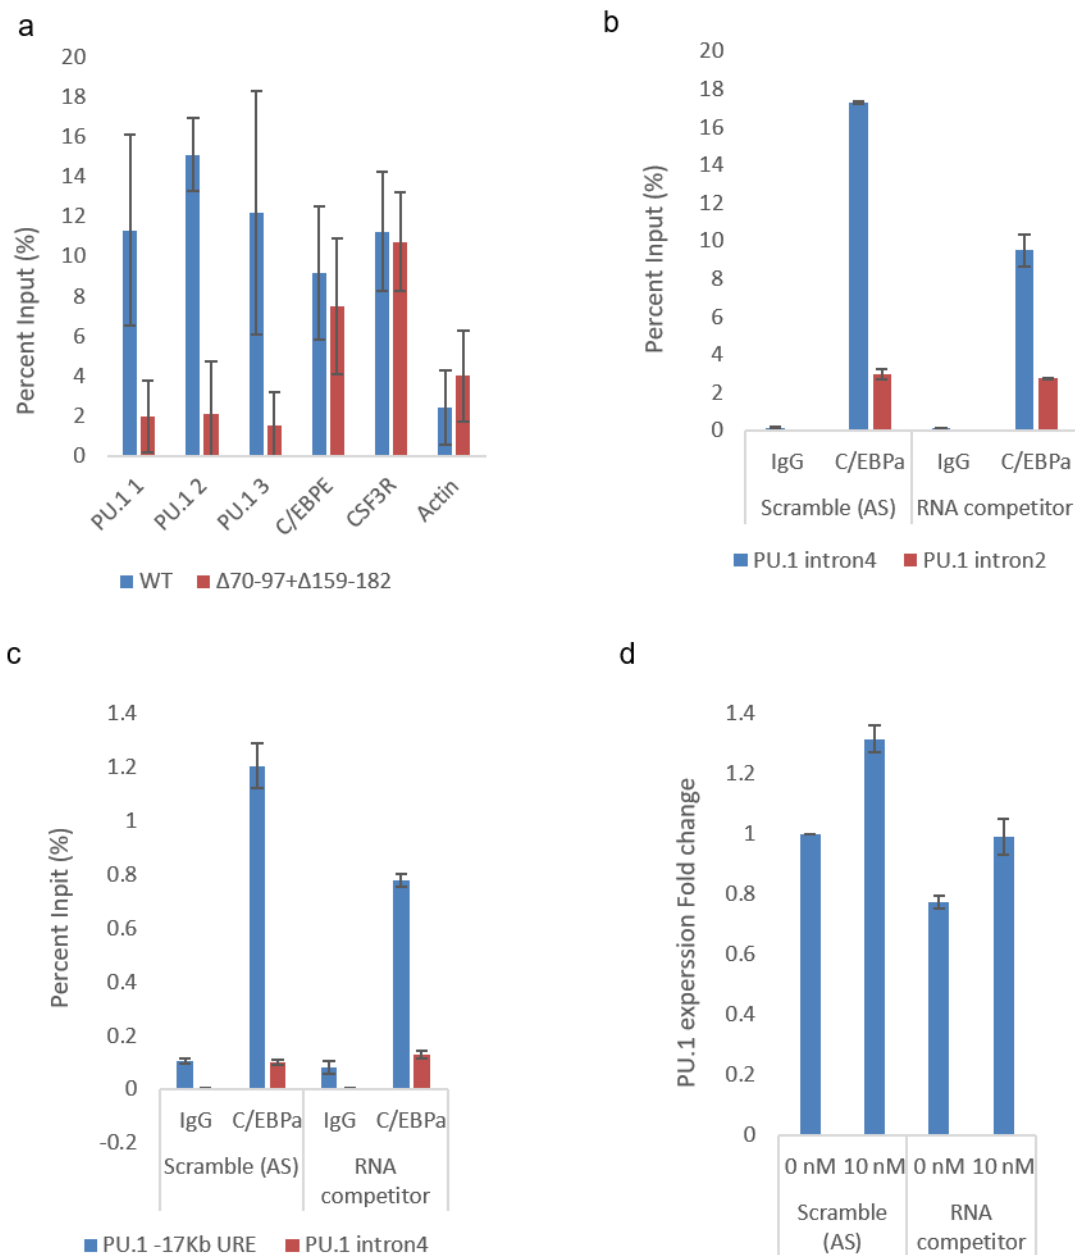

**Figure 6.** C/EBP $\alpha$  RNA binding activity promotes its chromatin recruitment. (a) ChIP-qRT-PCR analysis of GFP positive transplanted mouse primary spleen and bone marrow cells shows decreased enrichment of C/EBP $\alpha$  to PU.1 enhancer site but not C/EBPE and GCSFR (CSF3R) sites upon RNA binding domains deletion. (b) C/EBP $\alpha$  binding to PU.1 intron 4 decreased upon RNA competitor treatment. (c) C/EBP $\alpha$  recruitment to PU.1 enhancer site decreased upon RNA competitor treatment. (d) RNA competitor downregulates PU.1 expression level and inhibits PU.1 induction by PMA.

5
